# Supplementary material for: Neutral d8 metal complexes with intervalence charge-transfer transition trigger an effective NIR-II photothermal conversion for solar-driven desalination
Source: Royal Society of Chemistry journal article supplement (doi:10.1039/d3ta05474h), 2023-01-01
Supplement: d3ta05474h1.pdf [file d3ta05474h1.pdf]

*Electronic Supporting Information*

# Neutral $d^8$ Metal Complexes with Intervalence Charge-Transfer Transition Triggers Effective NIR-II Photothermal Conversion for Solar-Driven Desalination

Yung-Cong Yang,<sup>†,#</sup> Joanna S. Lin,<sup>†,#</sup> and Jen-Shyang Ni<sup>†\*</sup>

<sup>†</sup> *Department of Chemical and Materials Engineering, Photo-sensitive Material Advanced Research and Technology Center (Photo-SMART), National Kaohsiung University of Science and Technology, Kaohsiung 80778, Taiwan*

<sup>#</sup> *These authors contributed equally to this work*

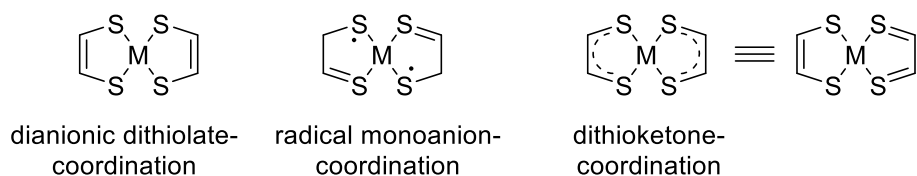

**Scheme S1.** The three coordination forms of neutral  $d^8$  metal bis-dithiolene complexes. (M = Ni, Pd, Pt)

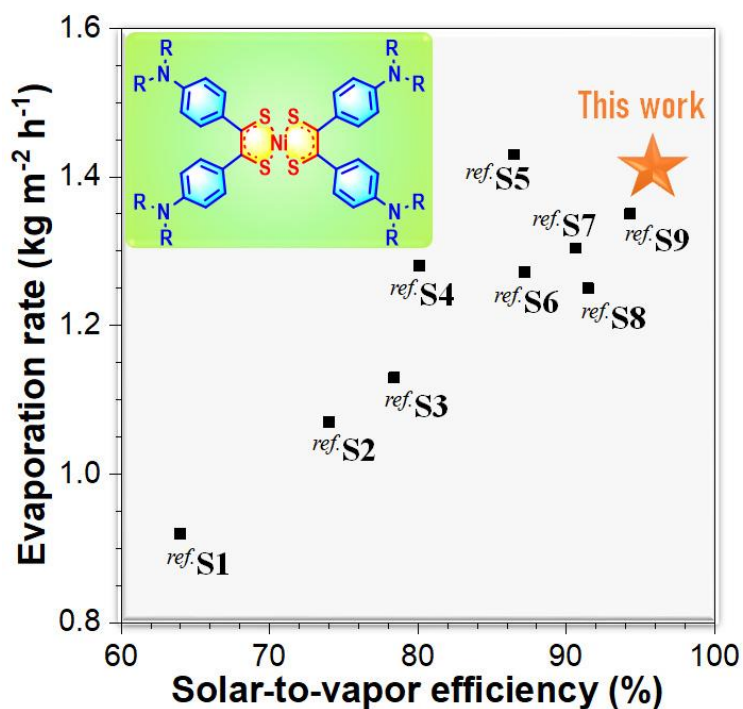

**Scheme S2.** The solar energy-to-vapor efficiency and water-mass evaporation rate of solar-thermal conversion materials based on small molecules.<sup>[S1-S9]</sup>

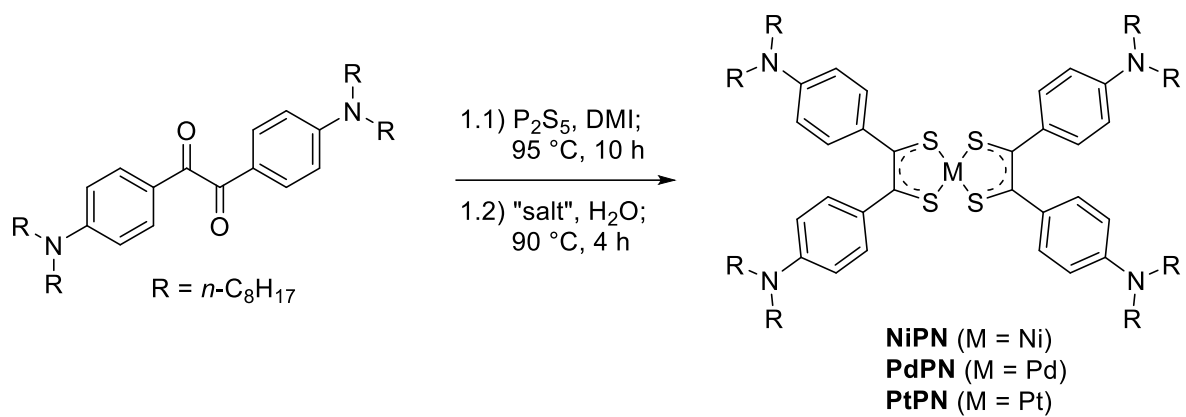

**Scheme S3.** Synthetic routes of neutral  $d^8$  transition-metal bis-dithiolene complexes. The "salt" is  $NiCl_2 \cdot 6H_2O$  for NiPN,  $Na_2PdCl_4$  for PdPN, and  $K_2PtCl_4$  for PtPN, respectively.

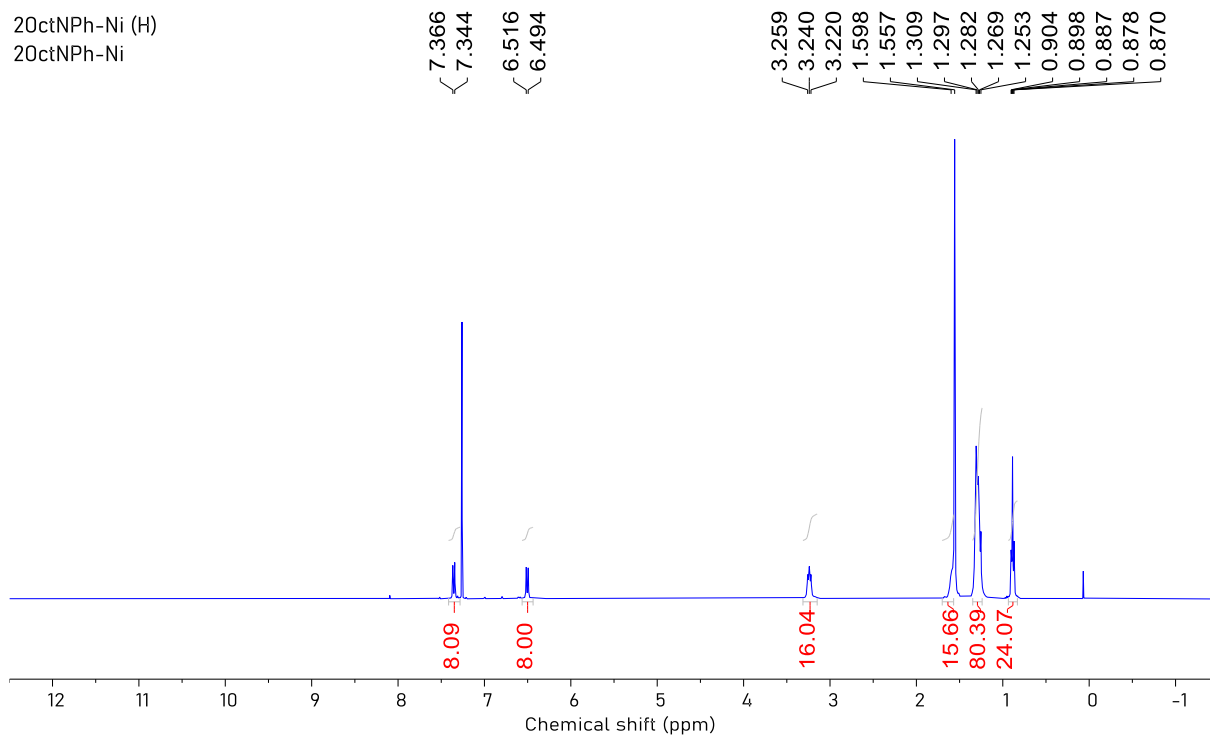

**Figure S1.** The  $^1\text{H}$ -NMR spectrum of NiPN in  $\text{CDCl}_3$ .

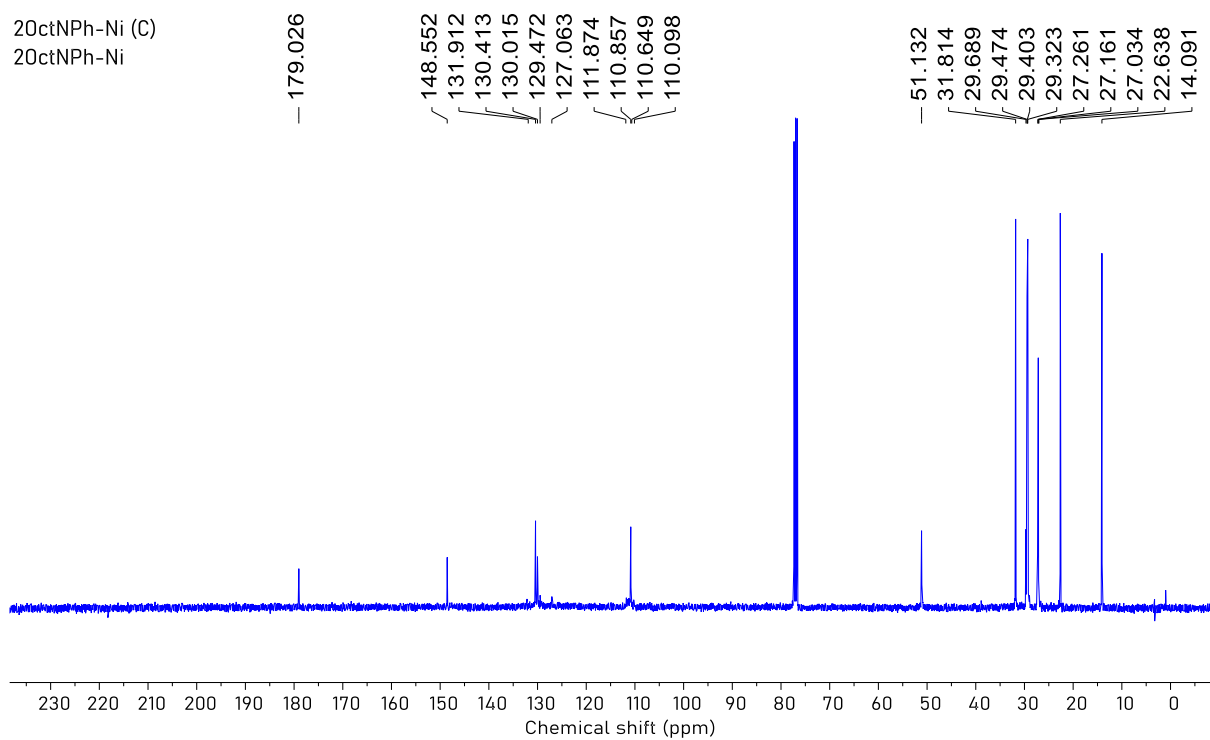

**Figure S2.** The  $^{13}\text{C}$ -NMR spectrum of NiPN in  $\text{CDCl}_3$ .

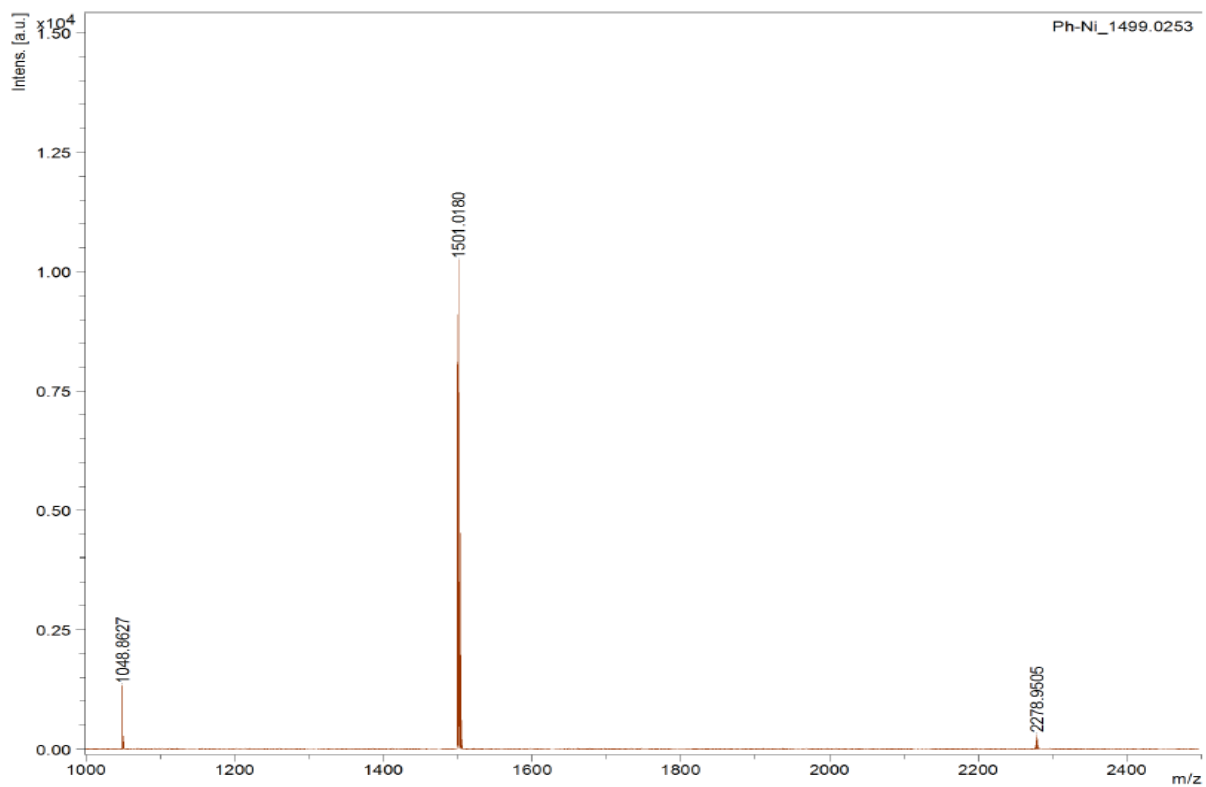

**Figure S3.** High-resolution mass spectrum of NiPN.

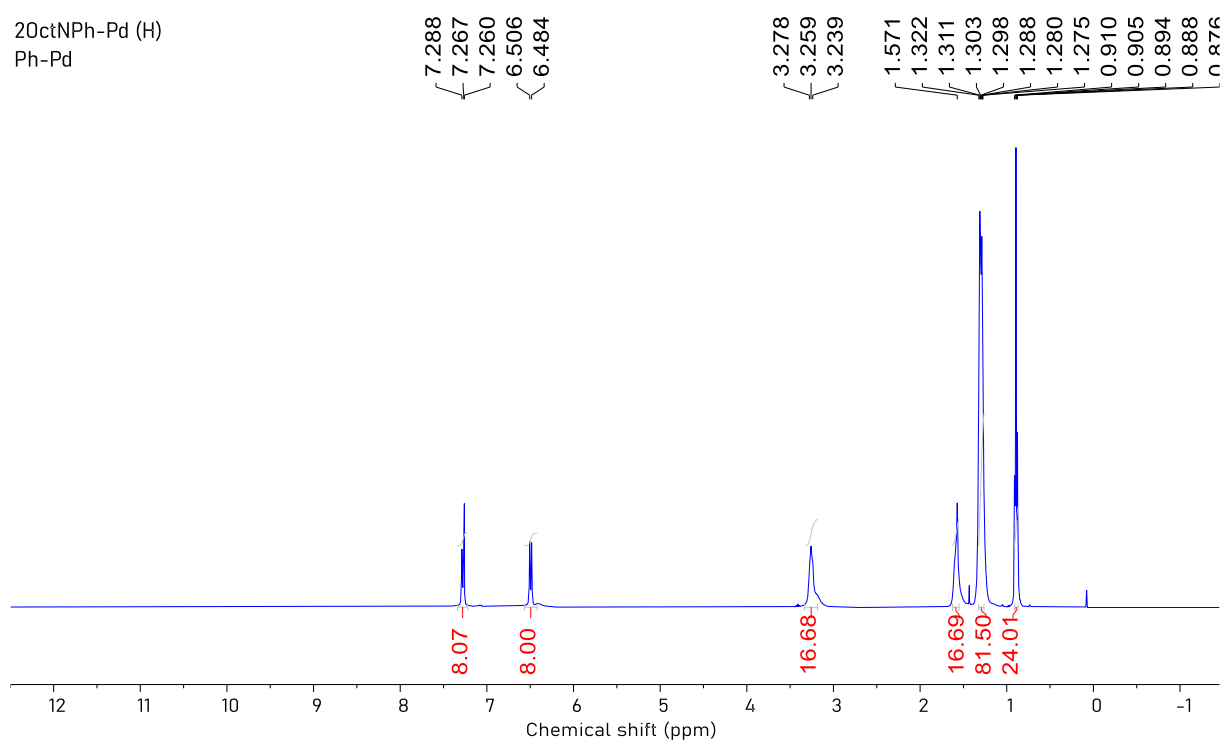

**Figure S4.** The  $^1\text{H}$ -NMR spectrum of PdPN in  $\text{CDCl}_3$ .

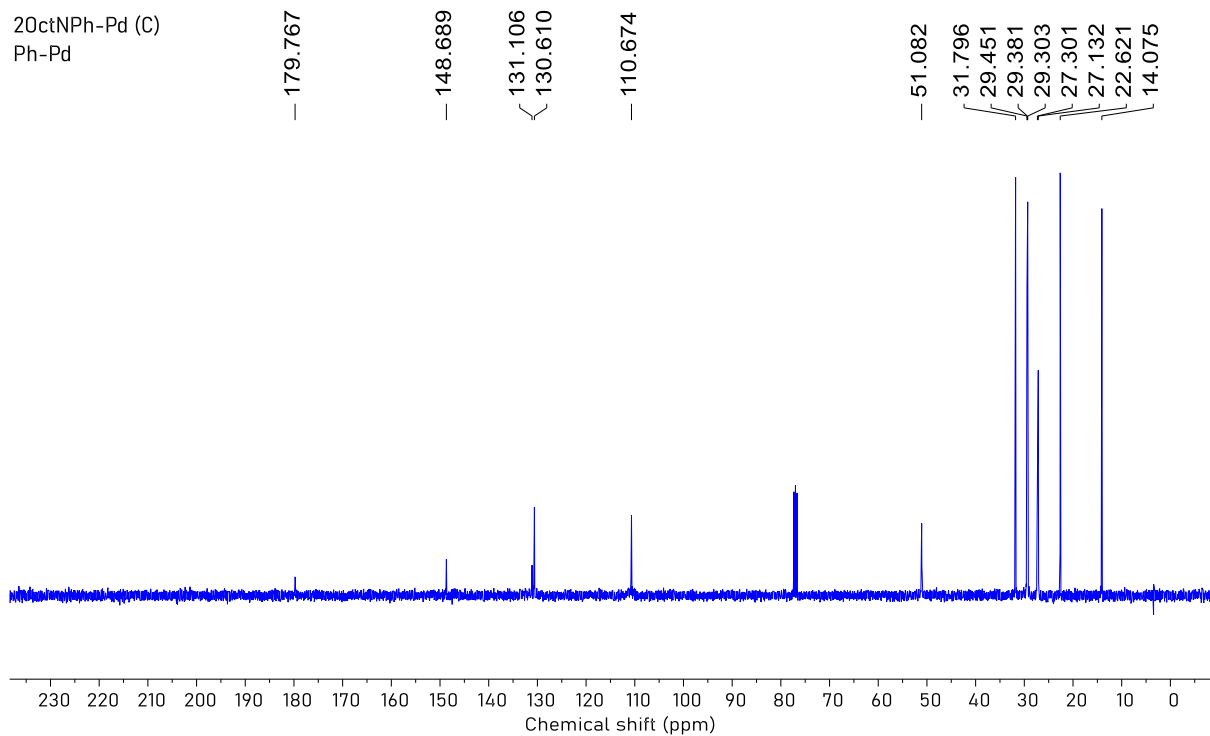

**Figure S5.** The  $^{13}\text{C}$ -NMR spectrum of PdPN in  $\text{CDCl}_3$ .

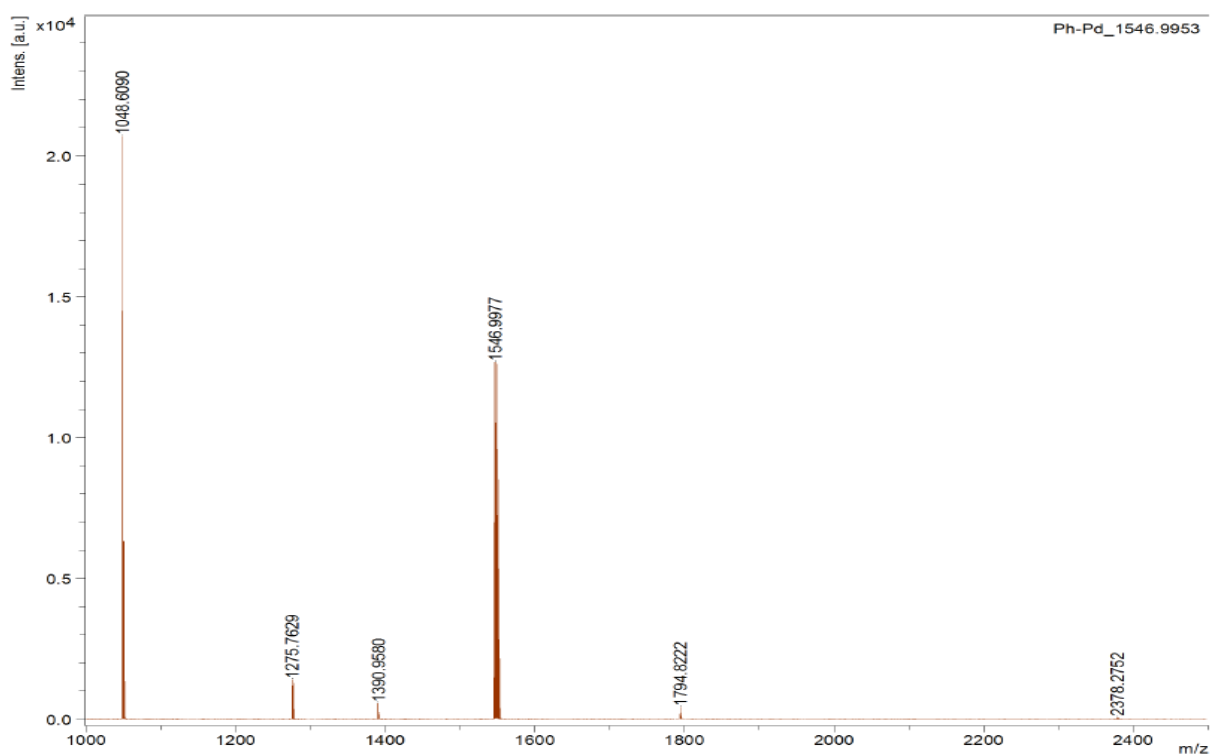

**Figure S6.** High-resolution mass spectrum of PdPN.

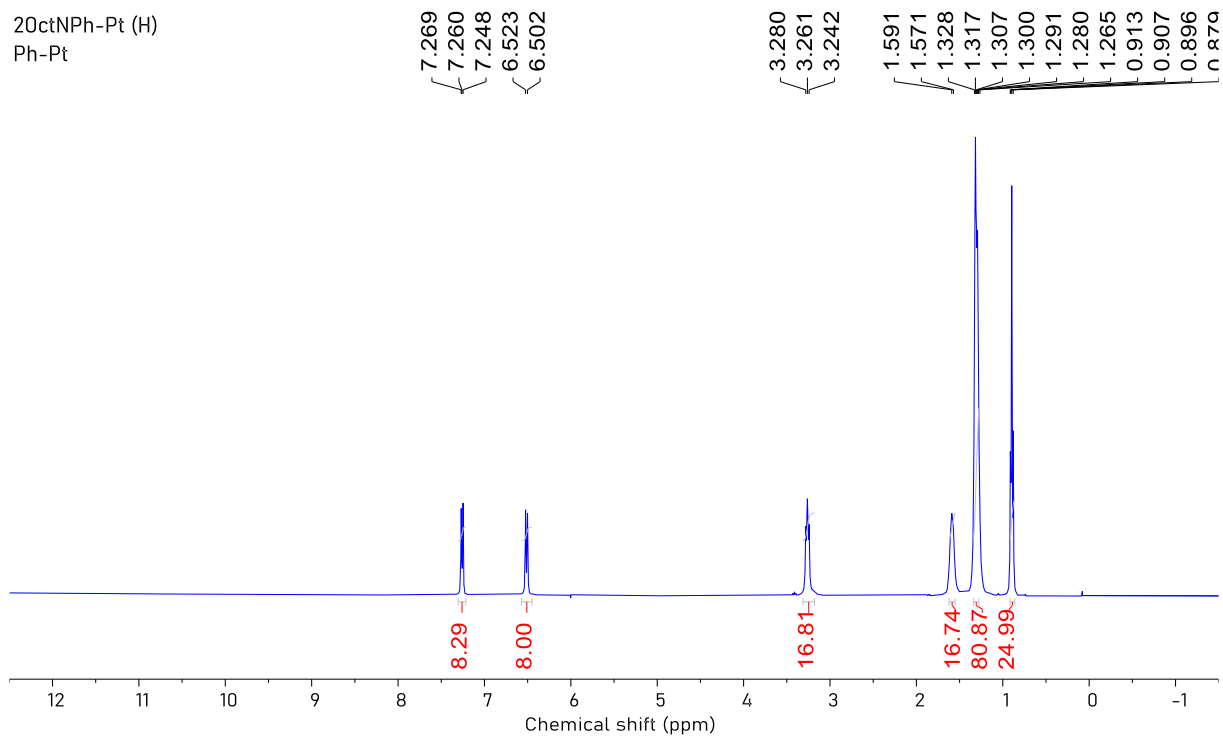

**Figure S7.** The  $^1\text{H}$ -NMR spectrum of PtPN in  $\text{CDCl}_3$ .

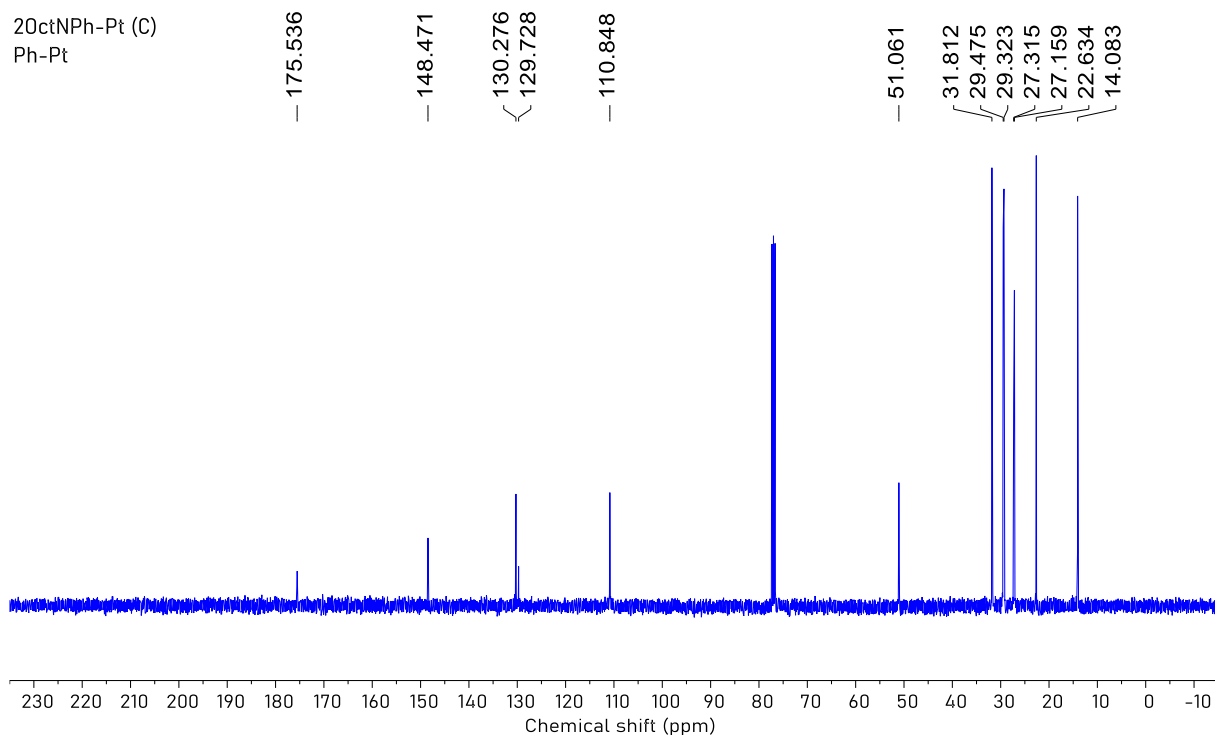

**Figure S8.** The  $^{13}\text{C}$ -NMR spectrum of PtPN in  $\text{CDCl}_3$ .

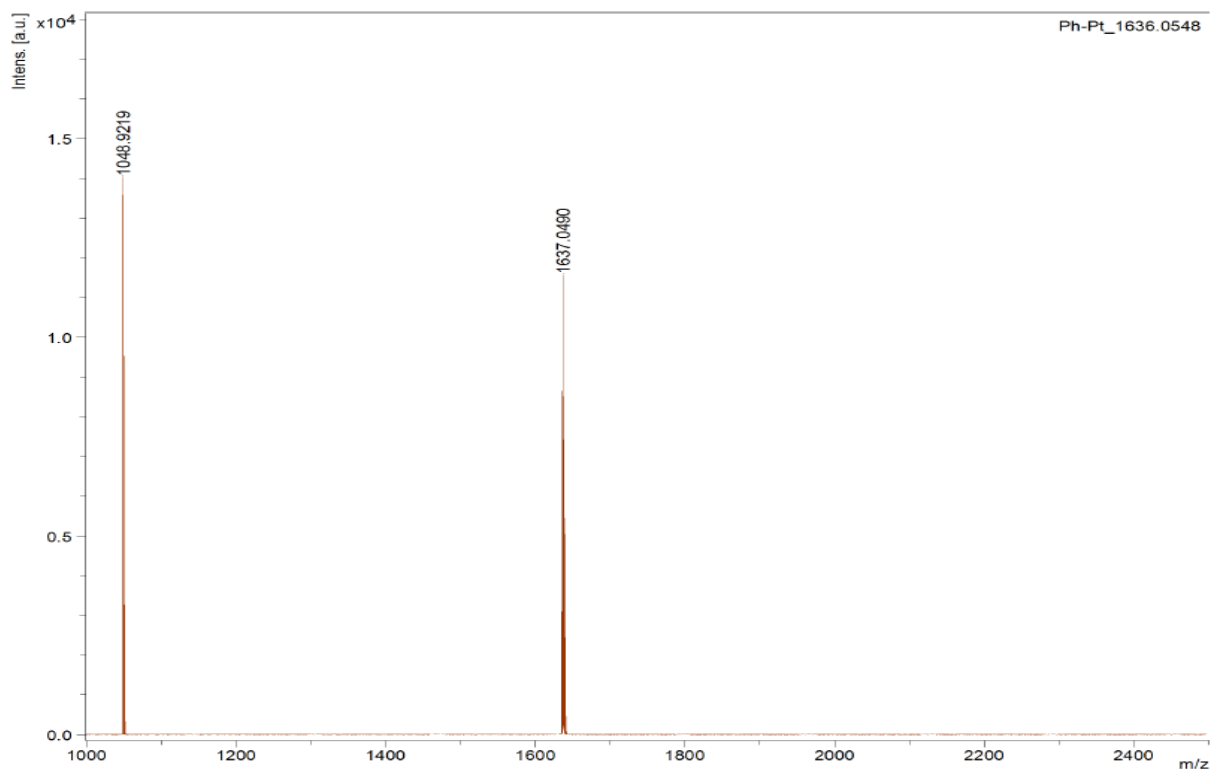

Figure S9. High-resolution mass spectrum of PtPN.

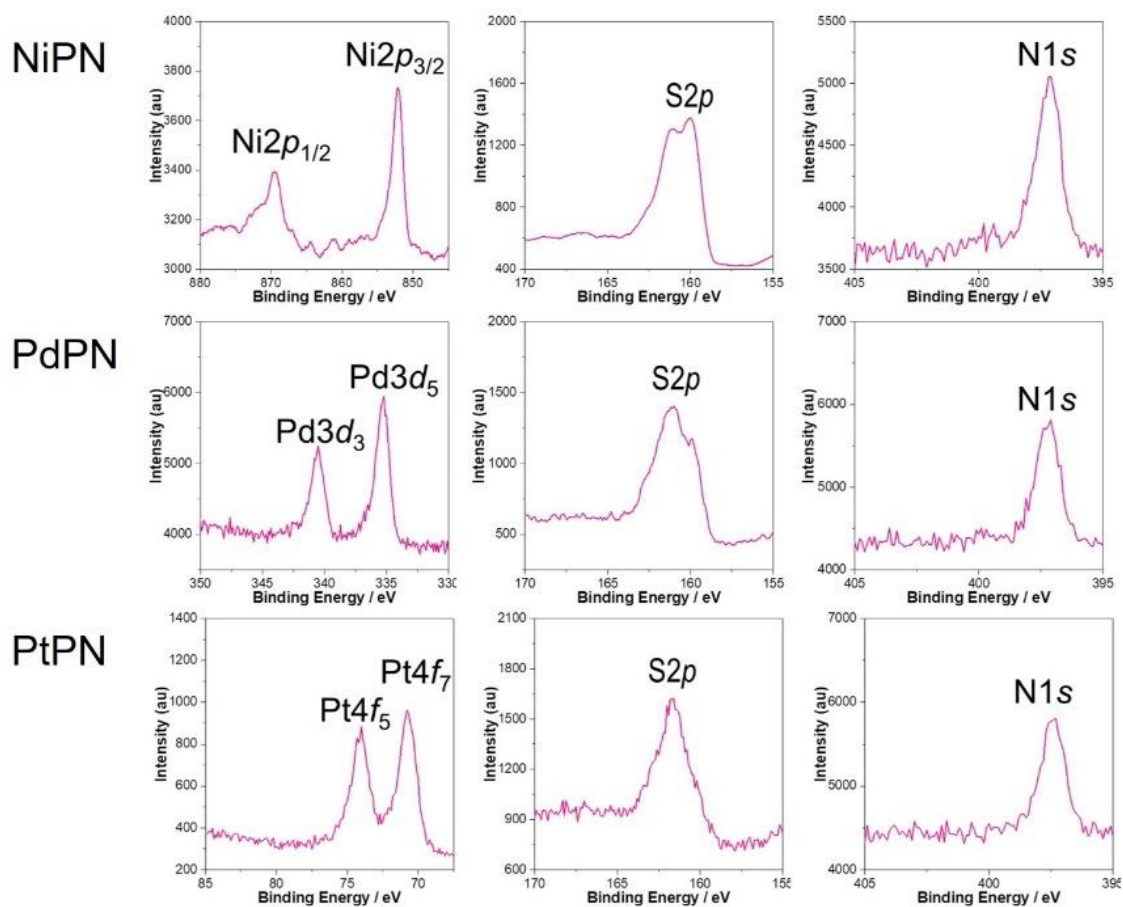

Figure S10. X-ray photoelectron spectroscopy (XPS) spectra of NiPN, PdPN, and PtPN powders.



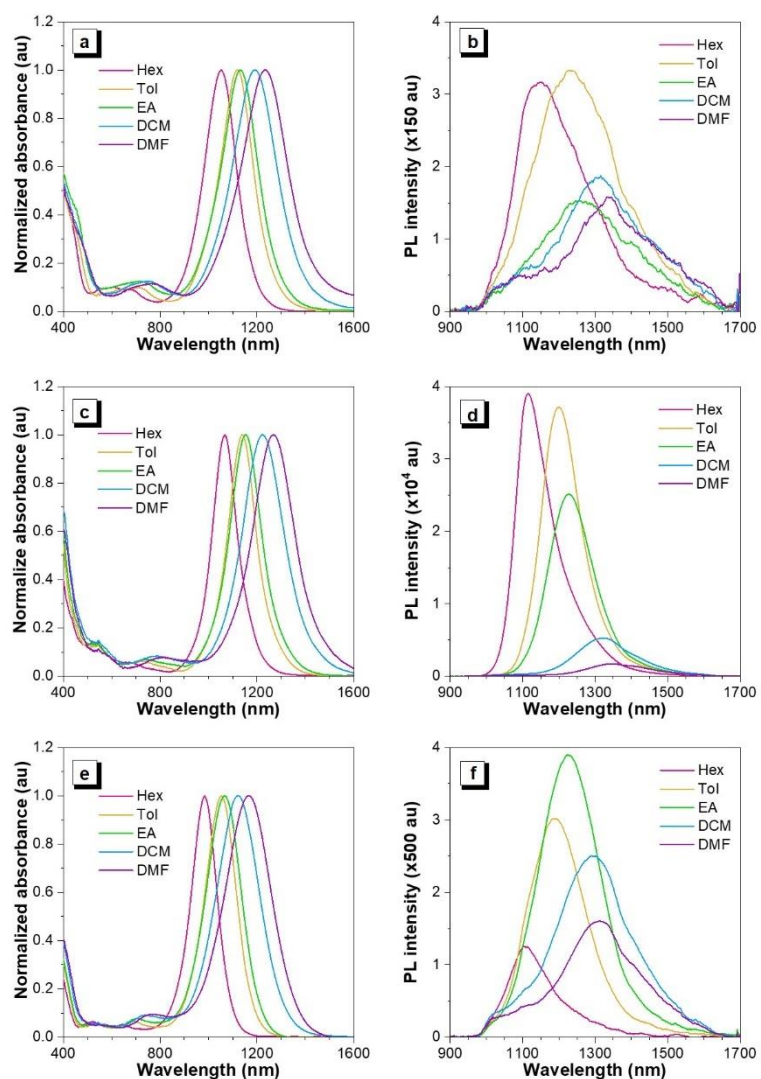

**Figure S11.** (a, c, and e) Normalized UV-vis-NIR absorption and (b, d, and f) PL spectra of NiPN (a, b), PdPN (c, d), and PtPN (e, f), respectively, in the different solvents (10  $\mu$ M). The excitation wavelength is 808 nm. (Hex: hexane; Tol: toluene; EA: ethyl acetate; DCM: dichloromethane; DMF: dimethylformamide)

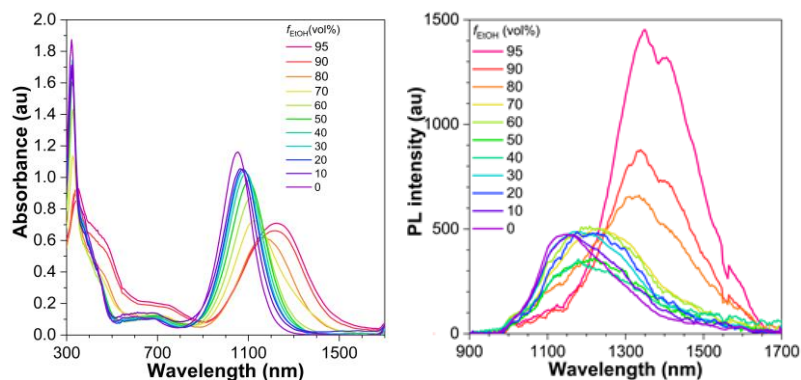

**Figure S12.** UV-vis-NIR absorption and PL spectra of NiPN with the different fractions of EtOH and hexane ( $f_{\text{EtOH}}$ , vol%) at a concentration of 10  $\mu\text{M}$ . The excitation wavelength is 808 nm.

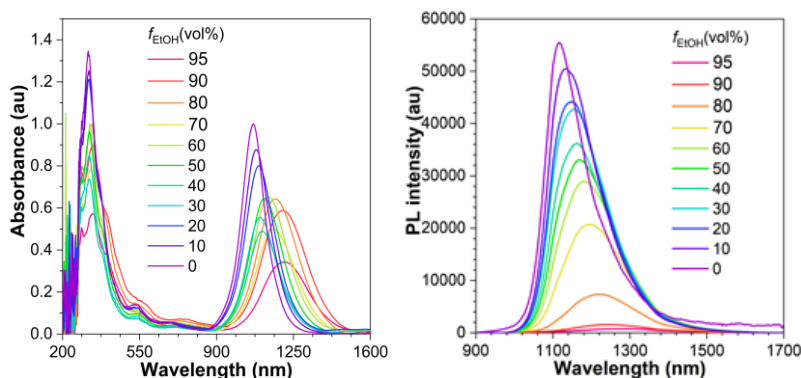

**Figure S13.** UV-vis-NIR absorption and PL spectra of PdPN with the different fractions of EtOH and hexane ( $f_{\text{EtOH}}$ , vol%) at a concentration of 10  $\mu\text{M}$ . The excitation wavelength is 808 nm.

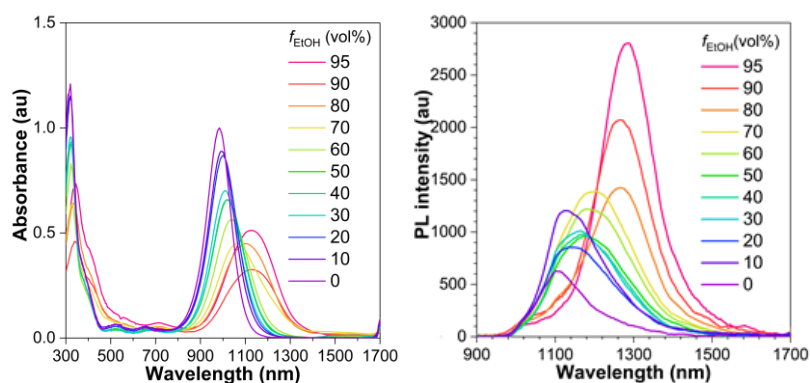

**Figure S14.** UV-vis-NIR absorption and PL spectra of PtPN with the different fractions of EtOH and hexane ( $f_{\text{EtOH}}$ , vol%) at a concentration of 10  $\mu\text{M}$ . The excitation wavelength is 808 nm.

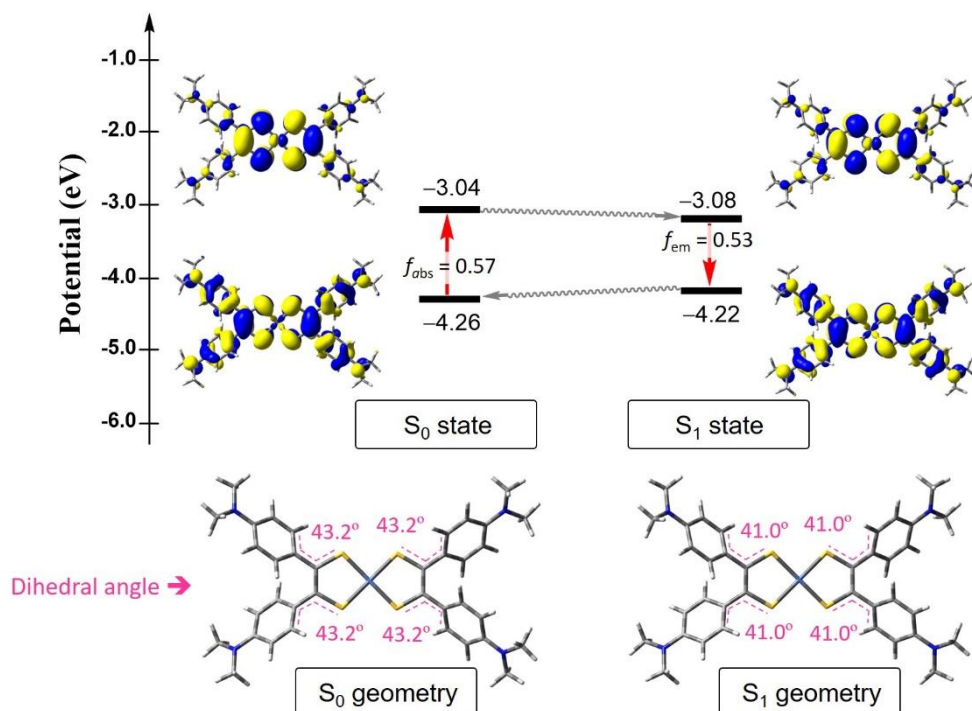

**Figure S15.** Molecular geometries, orbitals with isovalue of 0.02 a.u., energy levels, and dihedral angles of NiPN in the ground ( $S_0$ ) and excited ( $S_1$ ) states, calculated with TD-DFT at the level of B3LYP/6-31G(d)/LANL2DZ.

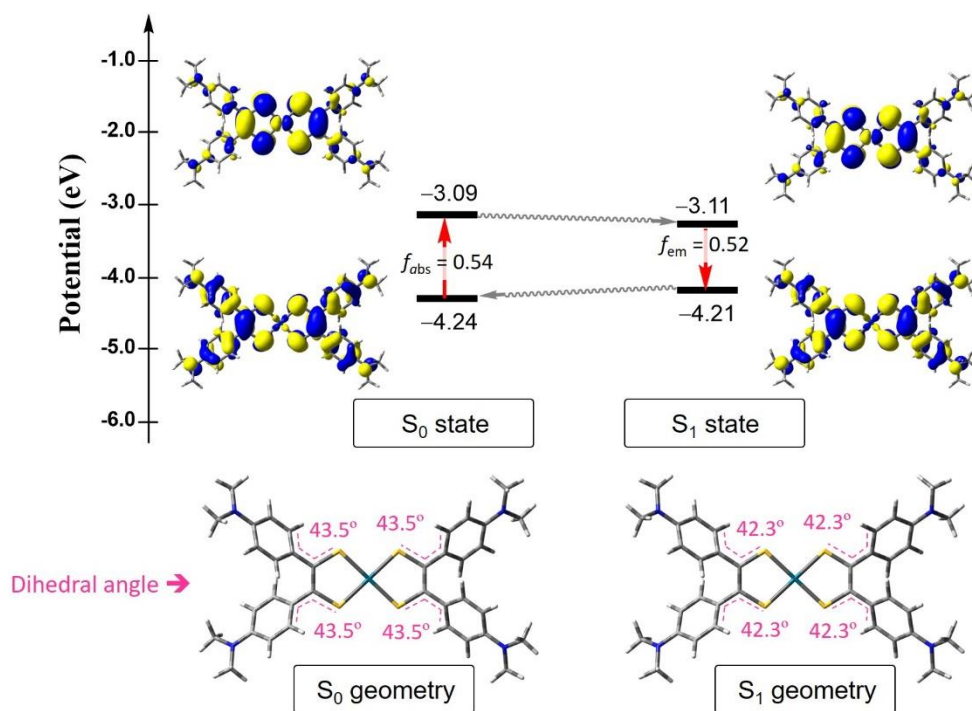

**Figure S16.** Molecular geometries, orbitals with isovalue of 0.02 a.u., energy levels, and dihedral angles of PdPN in the ground ( $S_0$ ) and excited ( $S_1$ ) states, calculated with TD-DFT at the level of B3LYP/6-31G(d)/LANL2DZ.

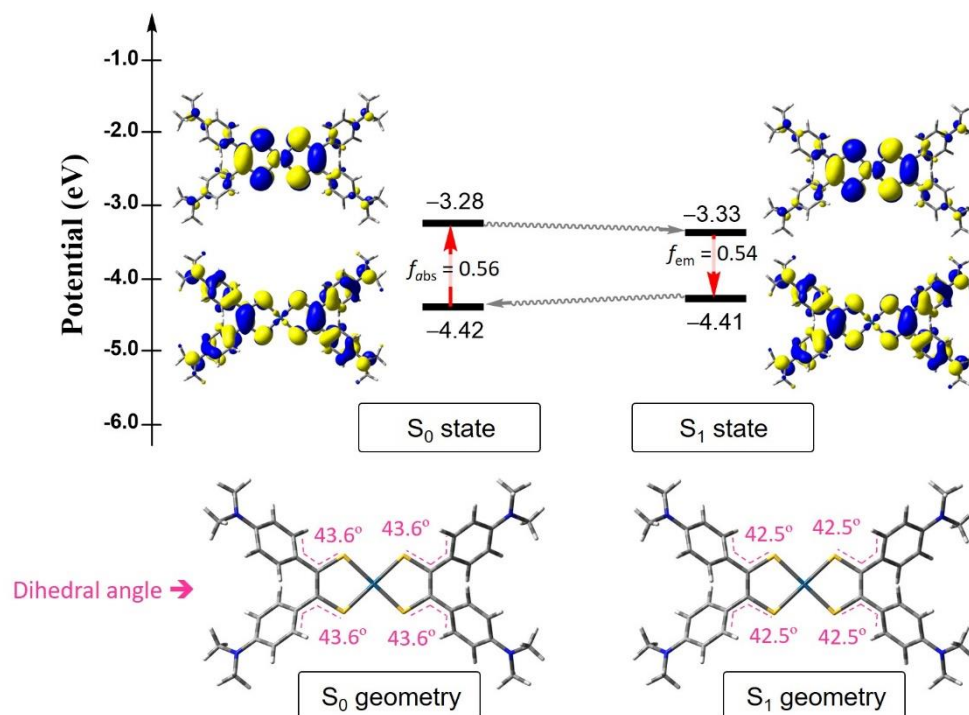

**Figure S17.** Molecular geometries, orbitals with isovalue of 0.02 a.u., energy levels, and dihedral angles of PtPN in the ground ( $S_0$ ) and excited ( $S_1$ ) states, calculated with TD-DFT at the level of B3LYP/6-31G(d)/LANL2DZ.

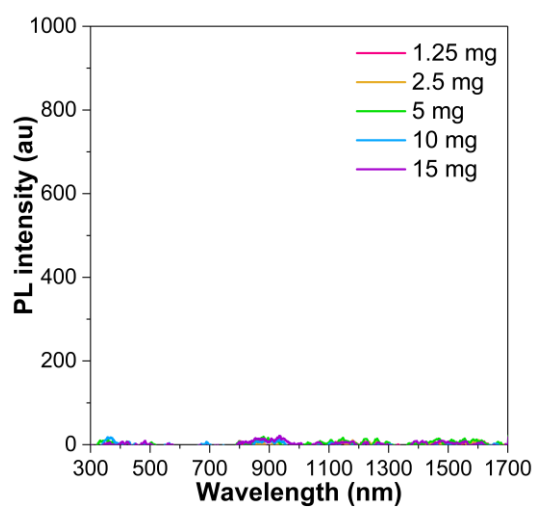

**Figure S18.** PL spectra of NiPN-adsorbed filter papers under the excitation wavelength of 808 nm.

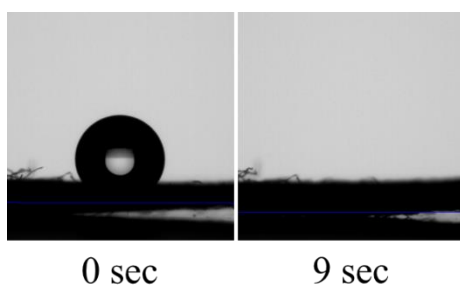

**Figure S19.** The time-dependent water contact angle (WCA) images of 1.25 mg of NiPN-loading filter papers.

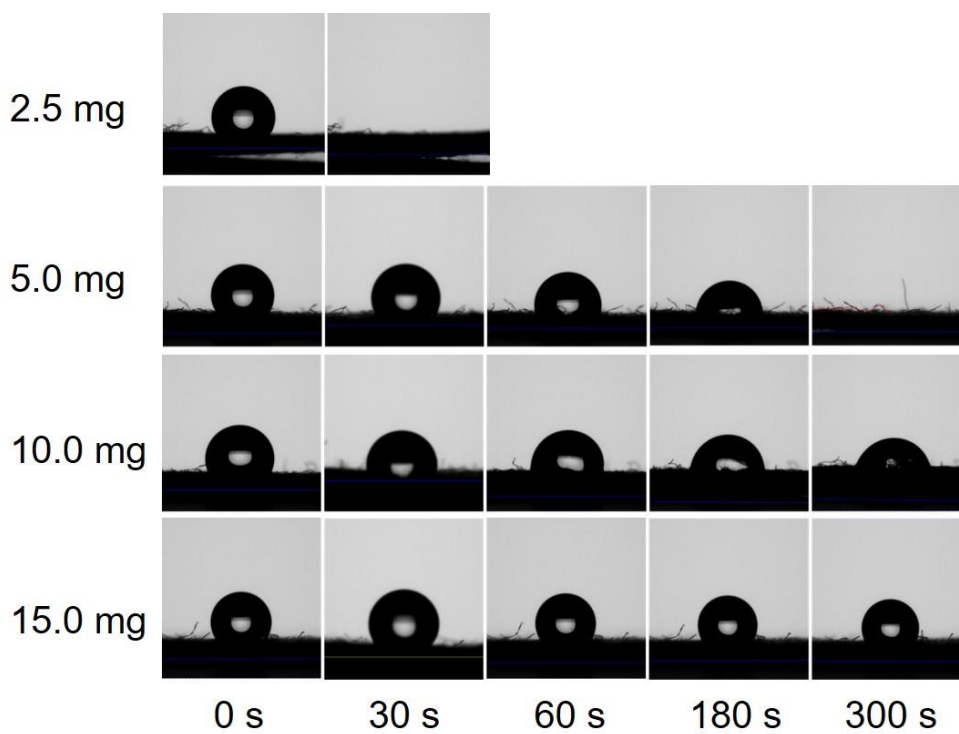

**Figure S20.** The time-dependent WCA images of NiPN-loading filter papers with different amounts, 2.5, 5.0, 10.0, and 15.0 mg, respectively.

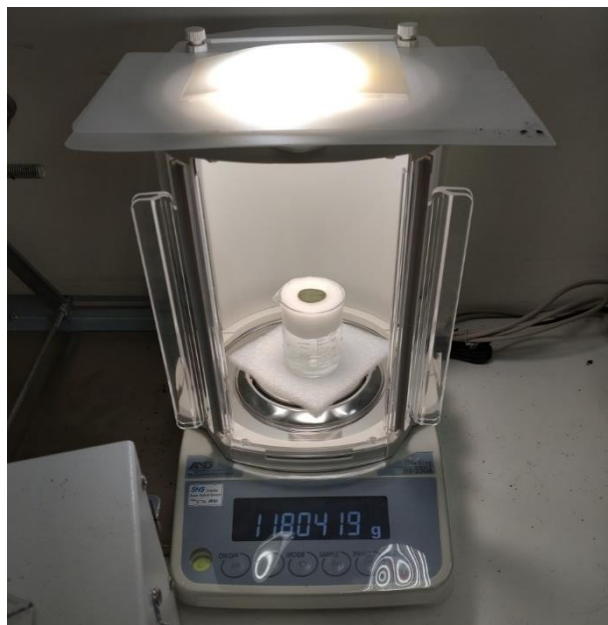

**Figure S21.** Camera photos of solar-driven evaporation device.

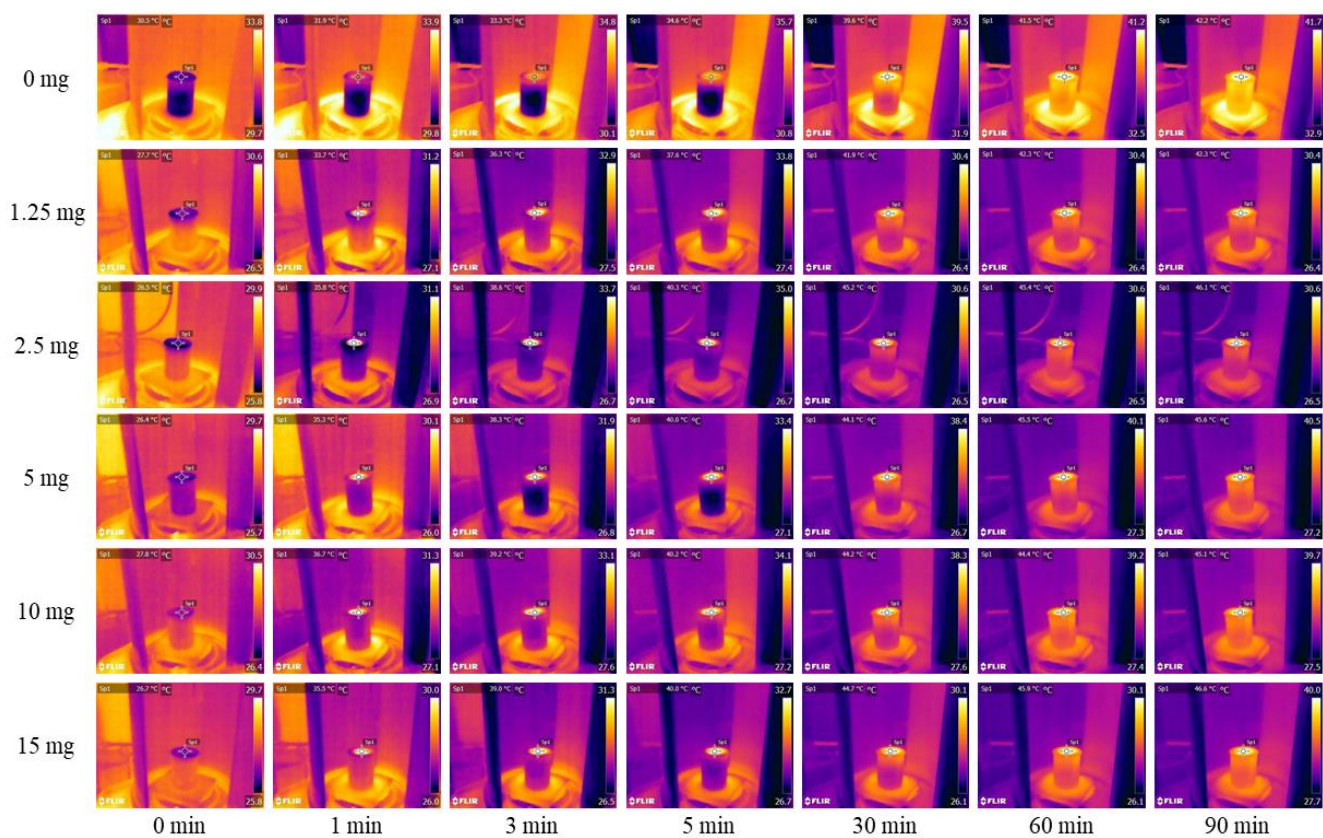

**Figure S22.** Infrared images of the solar-thermal interfacial-heating evaporation layers adsorbed with the different amounts of NiPN under 1 sun irradiation during time.

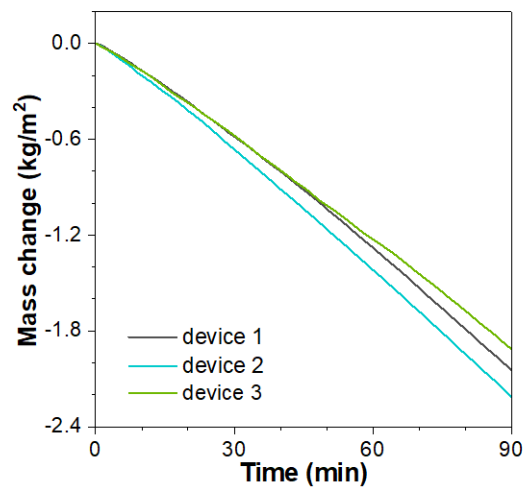

**Figure S23.** Time-dependent water-mass change curves using 2.5 mg of activated carbon-loading device under 1 sun irradiation.

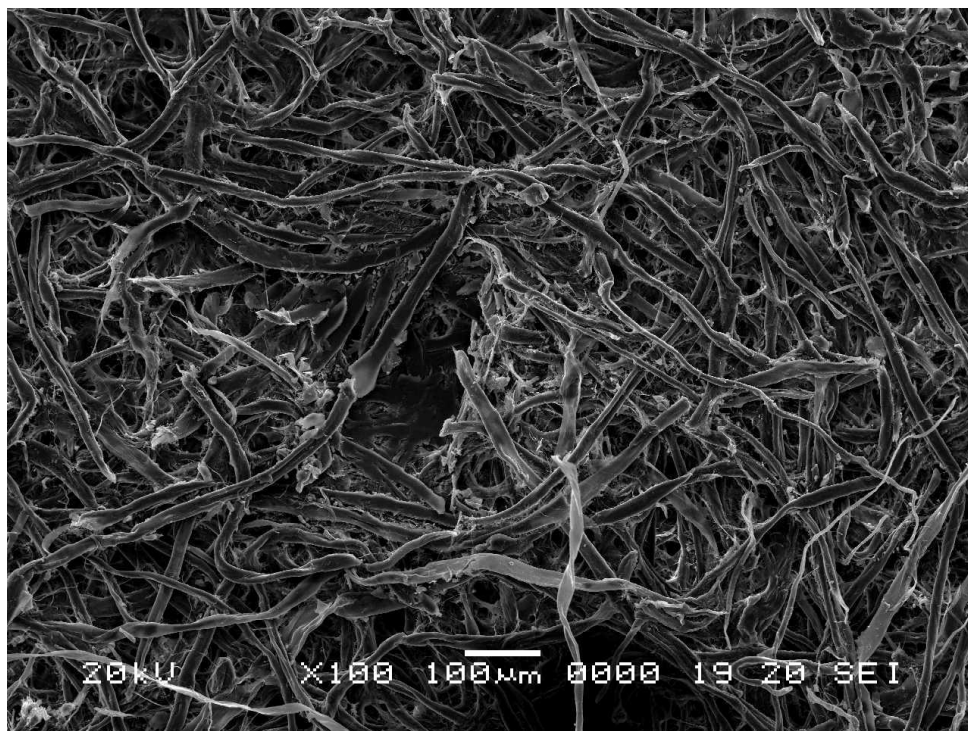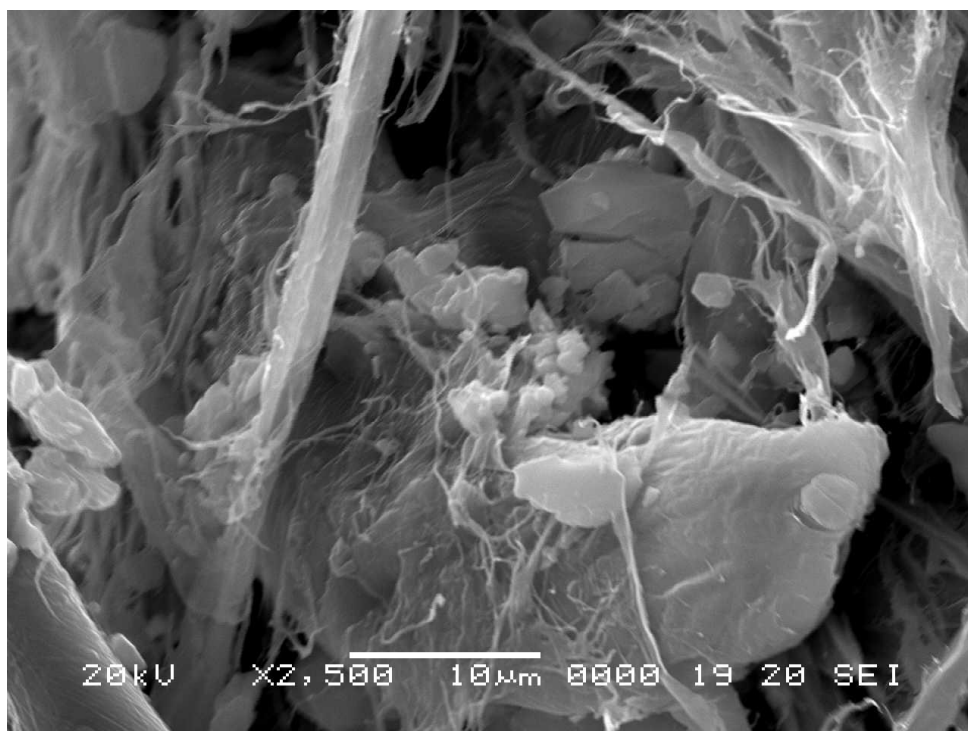

**Figure S24.** Scanning electron microscope images of NiPN loading filter paper, i.e., NiNP-adsorbed evaporators.



**Table S1.** Calculation data of organometallic complexes in  $S_0$  state.

| Molecules | States   | Configurations                                                                      | $E$ (eV) | $\lambda$ (nm) | $f_{os}$ |
|-----------|----------|-------------------------------------------------------------------------------------|----------|----------------|----------|
| NiNP      | $S_{01}$ | H $\rightarrow$ L (96%)                                                             | 1.18     | 1050.05        | 0.565    |
|           | $S_{02}$ | H-7 $\rightarrow$ L+1 (3%), H-5 $\rightarrow$ L (12%),<br>H-2 $\rightarrow$ L (83%) | 1.52     | 818.26         | 0.002    |
|           | $S_{03}$ | H-6 $\rightarrow$ L (3%), H-1 $\rightarrow$ L (91%),<br>H $\rightarrow$ L+1 (6%)    | 1.56     | 796.62         | 0.000    |
| PdNP      | $S_{01}$ | H $\rightarrow$ L (96%)                                                             | 1.13     | 1093.18        | 0.536    |
|           | $S_{02}$ | H-6 $\rightarrow$ L (4%), H-1 $\rightarrow$ L (92%),<br>H $\rightarrow$ L+1 (4%)    | 1.52     | 818.24         | 0.000    |
|           | $S_{03}$ | H-5 $\rightarrow$ L (2%), H-2 $\rightarrow$ L (97%)                                 | 1.55     | 798.16         | 0.004    |
| PtNP      | $S_{01}$ | H $\rightarrow$ L (97%)                                                             | 1.09     | 1136.01        | 0.563    |
|           | $S_{02}$ | H-5 $\rightarrow$ L (6%), H-2 $\rightarrow$ L (93%)                                 | 1.33     | 931.58         | 0.002    |
|           | $S_{03}$ | H-1 $\rightarrow$ L (98%)                                                           | 1.42     | 875.25         | 0.000    |

\* Calculated with TD-DFT at the level of B3LYP/6-31G(d)/LANL2DZ.  $S_{01}$ ,  $S_{02}$ , and  $S_{03}$  denoted the first, second, and third vertical transition from the  $S_0$  state to the  $S_1$ ,  $S_2$ , and  $S_3$ , respectively, and  $f_{os}$  denoted oscillator strength between the ground and excited states.

**Table S2.** Calculation data of organometallic complexes in  $S_0$  state.

| Molecules | States   | Configurations                                      | $E$ (eV) | $\lambda$ (nm) | $f_{os}$ |
|-----------|----------|-----------------------------------------------------|----------|----------------|----------|
| NiNP      | $S_{10}$ | H $\rightarrow$ L (96%)                             | 1.12     | 1111.46        | 0.534    |
| PdNP      | $S_{10}$ | H $\rightarrow$ L (96%), H-6 $\rightarrow$ L+1 (2%) | 1.09     | 1140.88        | 0.520    |
| PtNP      | $S_{10}$ | H $\rightarrow$ L (98%)                             | 1.04     | 1187.31        | 0.536    |

Calculated with TD-DFT at the level of B3LYP/6-31G(d)/LANL2DZ.  $S_{10}$  denoted the first vertical transition from the  $S_1$  to  $S_0$  states, and  $f_{os}$  denoted oscillator strength between the ground and excited states.

## Supporting References

- S1 Wang, D.; Qi, S.; Dong, J.; Wang, X.; Zhang, Y.; Zhou, S.; Gu, P.; Jia, T.; Zhang, Q., *Org. Lett.* **2023**, *25*, 5730-5734.
- S2 Cui, Y.; Liu, J.; Li, Z.; Ji, M.; Zhao, M.; Shen, M.; Han, X.; Jia, T.; Li, C.; Wang, Y., *Adv. Funct. Mater.* **2021**, *31*, 2106247.
- S3 Zhao, M.; Zhu, Y.; Pan, Y.; Wang, Y.; Xu, T.; Zhao, X.; Jia, T.; Zhang, Z.; Chen, Z., *ACS Appl. Energy Mater.* **2022**, *5*, 15758-15767.
- S4 Prakoso, S. P.; Sun, S. S.; Saleh, R.; Tao, Y. T.; Wang, C. L., *ACS Appl. Mater. Interfaces* **2021**, *13*, 38365-38374.
- S5 Li, H.; Wen, H.; Li, J.; Huang, J.; Wang, D.; Tang, B. Z., *ACS Appl. Mater. Interfaces* **2020**, *12*, 26033-26040.
- S6 Chen, G.; Sun, J.; Peng, Q.; Sun, Q.; Wang, G.; Cai, Y.; Gu, X.; Shuai, Z.; Tang, B. Z., *Adv. Mater.* **2020**, *32*, e1908537.
- S7 Zhang, X.; Li, Y.; Chen, Z.; Li, P.; Chen, R.; Peng, X., *Dyes Pigm.* **2021**, *192*, 109460.
- S8 Dai, J.; Qi, S.; Zhao, M.; Liu, J.; Jia, T.; Liu, G.; Liu, F.; Sun, P.; Li, B.; Wang, C.; Zhou, J.; Lu, G., *Chem. Eng. J.* **2023**, *471*, 144745.
- S9 Zhang, R.; Jin, N.; Jia, T.; Wang, L.; Liu, J.; Nan, M.; Qi, S.; Liu, S.; Pan, Y., *J. Mater. Chem. A* **2023**, *11*, 15380-15388.
